# Supplementary material for: Bile Microbiome Signatures Associated with Pancreatic Ductal Adenocarcinoma Compared to Benign Disease: A UK Pilot Study
Source: MDPI journal article supplement (doi:10.3390/ijms242316888), 2023-11-28
Supplement: s1 [file s1]

**Table S1.** Summary of the patient cohort.

| Variables                             | PDAC (n=12)       | Benign cases (n= 17) | P-value  |
|---------------------------------------|-------------------|----------------------|----------|
| Age, Years (median, range)            | 71 (47-93)        | 64 (33-84)           | 0.330    |
| Sex, n, (%), Male: Female             | 7 (59%): 5 (41%)  | 12 (70%): 5 (30%)    | 0.728    |
| DM, presence, n, (%)                  | 2 (17%)           | 4 (24%)              | 0.650    |
| Regular PPI use, n, (%)               | 2 (17%)           | 4 (24%)              | 0.461    |
| Never-smoked, n, (%)                  | 6 (50%)           | 10 (59%)             |          |
| Ex-smoker, n, (%)                     | 4 (33%)           | 4 (24%)              |          |
| Smoker, n, (%)                        | 2 (17%)           | 3 (17%)              |          |
| Bilirubin (μmol/L) (median, range)    | 286 (115-428)     | 20.5 (9-94)          | < 0.0001 |
| CRP (μmol/L) (median, range)          | 23.15 (6.4-319.6) | 10.3 (2 - 129.6)     | 0.3744   |
| CA-199 (median, range)                | 1915 (201-84948)  | 9.5 (2 - 119)        | <0.0001  |
| Preoperative biliary drainage, (n, %) |                   |                      |          |
| Yes                                   | 12 (100%)         | 4 (24%)              |          |
| No                                    | 0                 | 13 (76%)             |          |
| Type of procedure performed, n, (%)   |                   |                      |          |
| ERCP                                  | 10 (83%)          | 17 (100%)            |          |
| PTBD                                  | 2 (17%)           | 0                    |          |
| Aetiology found at ERCP, n, (%)       |                   |                      |          |
| No abnormality                        | n/a               | 2 (11%)              |          |
| Duct dilatation                       | n/a               | 2 (11%)              |          |
| Benign inflammatory stricture         | n/a               | 4 (25%)              |          |
| Choledocholithiasis                   | n/a               | 7 (42%)              |          |
| Debris/grit/microlithiasis            | n/a               | 2 (11%)              |          |
| Tumour location= Head                 | 12 (100%)         | n/a                  |          |
| Stage, n, (%)                         |                   |                      |          |
| IA                                    | 2 (17%)           | n/a                  |          |
| IB                                    | 1 (8%)            | n/a                  |          |
| IIA                                   | 3 (25%)           | n/a                  |          |
| IIB                                   | 0                 | n/a                  |          |
| III                                   | 6 (50%)           | n/a                  |          |
| IV                                    | 0                 | n/a                  |          |

**Table S2.** We found four genera to be of significance among PDAC samples vs. benign adjusting for false discovery rate (FDR).

| Variable                                                                | Beta             | SE          | P           | FDR         | FC          | FC_lower    | FC_upper    |
|-------------------------------------------------------------------------|------------------|-------------|-------------|-------------|-------------|-------------|-------------|
| Bacteria_Proteobacteria_Enterobacterales_Enterobacteriaceae_Escherichia | -1.55672579      | 0.330932289 | 7.34E-05    | 0.002199348 | 0.339921663 | 0.216831599 | 0.532886983 |
| Bacteria_Proteobacteria_Others_Others_Others1                           | -<br>0.744065622 | 0.164563947 | 0.000118884 | 0.002199348 | 0.597054435 | 0.477439238 | 0.746637416 |
| Bacteria_Proteobacteria_Enterobacterales_Enterobacteriaceae_Others      | -<br>1.791811134 | 0.480610494 | 0.000945937 | 0.011666553 | 0.288809252 | 0.150328692 | 0.554856049 |
| Bacteria_Firmicutes_Lactobacillales_Streptococcaceae_Streptococcus      | 1.727734879      | 0.540590216 | 0.003638497 | 0.033656098 | 3.312073936 | 1.589064909 | 6.903326413 |

Table S3. MIMARKS Checklist.

| Item                                                                                                                        | Description                                                                                                                                                                     | MIMARKS survey | MIMARKS specimen |
|-----------------------------------------------------------------------------------------------------------------------------|---------------------------------------------------------------------------------------------------------------------------------------------------------------------------------|----------------|------------------|
| Investigation                                                                                                               |                                                                                                                                                                                 |                |                  |
| Submitted to INSDC                                                                                                          | Sequences data has been submitted to SRA (Sequence Read Archives)                                                                                                               | M              | M                |
| Investigation type                                                                                                          | MIMARKS specimen                                                                                                                                                                |                | M                |
| Project name                                                                                                                | Bile Microbiome Signatures as Biomarkers for Differentiating Pancreatic Ductal Adenocarcinoma from Benign Disease: Discovery of novel microbial signatures in a UK pilot study. | M              | M                |
| Environment                                                                                                                 |                                                                                                                                                                                 |                |                  |
| Geographic location (latitude and longitude <small>[float, point, transect and region]</small> )                            | Geographical coordinates of Guildford, 51°14′11″N 0°34′13″W                                                                                                                     | M              | M                |
| Geographic location (depth <small>[integer, point, interval, unit]</small> )                                                | Geographical coordinates of Guildford, 51°14′11″N 0°34′13″W                                                                                                                     | E              | E                |
| Geographic location (elevation of site <small>[integer, unit]</small> ; altitude of sample <small>[integer, unit]</small> ) | Geographical coordinates of Guildford, 51°14′11″N 0°34′13″W                                                                                                                     | E              | E                |
| Geographic location                                                                                                         | United Kingdom                                                                                                                                                                  | M              | M                |
| Collection date <small>[ISO8601]</small>                                                                                    | The time of sampling, 2021-2022                                                                                                                                                 | M              | M                |
| Environment (biome <small>[EnvO]</small> )                                                                                  | biome                                                                                                                                                                           | M              | M                |
| Environment (feature <small>[EnvO]</small> )                                                                                | n/a                                                                                                                                                                             | M              | M                |
| Environment (material <small>[EnvO]</small> )                                                                               | n/a                                                                                                                                                                             | M              | M                |
| MIGS/MIMS/MIMARKS extension                                                                                                 |                                                                                                                                                                                 |                |                  |
| Environmental package <small>[air, host-associated, human-associated, human-skin,</small>                                   | Human-associated                                                                                                                                                                | M              | M                |
| Nucleic acid sequence source                                                                                                |                                                                                                                                                                                 |                |                  |
| Isolation and growth conditions <small>[PMID, DOI or URL]</small>                                                           | Publication reference in the form of PubMed ID (PMID), digital object identifier (DOI) or URL for isolation and growth condition specifications of the organism/material        | –              | M                |
| Sequencing                                                                                                                  |                                                                                                                                                                                 |                |                  |

| Item                                                                | Description                                                                                                                                                                                                                                                                                                                                                                                       | MIMARKS survey | MIMARKS specimen |
|---------------------------------------------------------------------|---------------------------------------------------------------------------------------------------------------------------------------------------------------------------------------------------------------------------------------------------------------------------------------------------------------------------------------------------------------------------------------------------|----------------|------------------|
| Target gene or locus (e.g., 16S rRNA, 18S rRNA, nif, amoA, rpo)     | 16S rRNA gene study                                                                                                                                                                                                                                                                                                                                                                               | M              | M                |
| Sequencing method (e.g., dideoxysequencing, pyrosequencing, polony) | The variable regions V3-V4 area of the 16S ribosomal RNA (rRNA) gene was amplified by polymerase chain reaction (PCR) using bacterial and reverse primers. Samples were prepared with a protocol 22, using KAPA HiFi Polymerase to amplify variable region 4 (515f/806r) of the 16S rRNA gene. Samples underwent 30 cycles of PCR. Libraries were sequenced at Diversigen (New Brighton, MN, USA) | M              | M                |
